# Supplementary material for: Separation of hydrogen isotopes using a protonic ceramic fuel cell
Source: Royal Society of Chemistry journal article supplement (doi:10.1039/d4ta07321e), 2025-01-01
Supplement: d4ta07321e1.pdf [file d4ta07321e1.pdf]

Supporting Information

## Separation of Hydrogen Isotopes using a proton ceramic fuel cell

Meilong Chen,<sup>ac</sup> Kai Zhao,<sup>ab</sup> Jun Li,<sup>ab</sup> Guixiang Lin,<sup>b</sup> Dustin Banham,<sup>ab</sup> Li Du<sup>c</sup> and Min Chen<sup>\*ab</sup>

<sup>a</sup> School of Materials Science and Energy, Foshan University, Foshan 528000, P.R.China.

<sup>b</sup> Guangdong Key Laboratory for Hydrogen Energy Technologies, Foshan 528000, P.R.China.

<sup>c</sup> School of Chemistry and Chemical Engineering, South China University of Technology, Guangzhou 510640, P.R.China.

\*Corresponding authors. Email address: minchen1981@126.com.

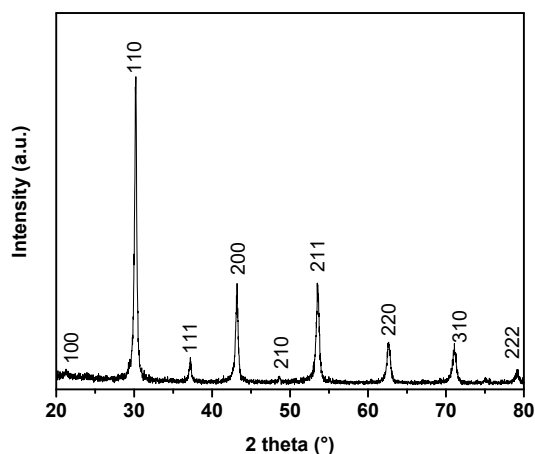

Figure S1 XRD pattern of the BZY powder calcined at 1150 °C for 10 h.

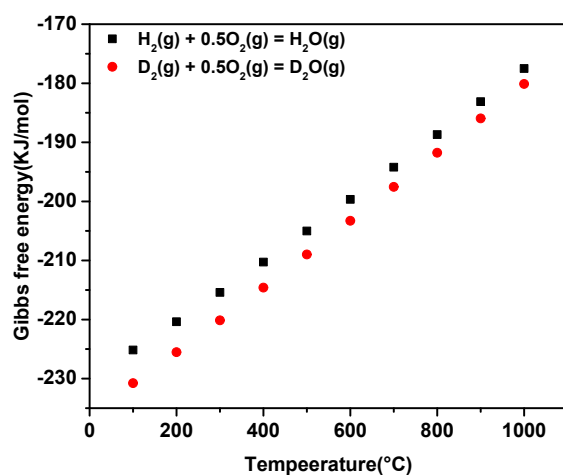

Figure S2 Gibbs free energy change values for the reaction of  $\text{H}_2(\text{g}) + 0.5\text{O}_2(\text{g}) = \text{H}_2\text{O}(\text{g})$  and  $\text{D}_2(\text{g}) + 0.5\text{O}_2(\text{g}) = \text{D}_2\text{O}(\text{g})$ .

**Calculation of Separation Factor Values:** The hydrogen/deuterium separation factor ( $\alpha$ ) can be calculated using the equations below;

$$\alpha = \left( \frac{[\text{H}]}{[\text{D}]} \right)_L : \left( \frac{[\text{H}]}{[\text{D}]} \right)_G \quad (1)$$

Where  $[\text{H}]_L$ ,  $[\text{D}]_L$ , and  $[\text{H}]_G$ ,  $[\text{D}]_G$  represent the liquid-phase quantities of the isotopes at the cathode and the gas-phase isotopes at the anode expressed as concentrations, respectively. In infrared spectroscopy, the isotopic content corresponds to the area of the corresponding peak. Assuming that the peak area of the  $\text{D}_2\text{O}$  is A, the peak area of the HDO is B, and the peak area of the HD is C, the  $[\text{D}]_L$  and  $[\text{H}]_L$  concentration can be obtained by the following equation;

$$[\text{D}_2\text{O}] = [\text{D}]_L = \frac{A + B/2}{A + B + C} \quad (2)$$

$$[\text{H}_2\text{O}] = [\text{H}]_L = \frac{C + B/2}{A + B + C} \quad (3)$$

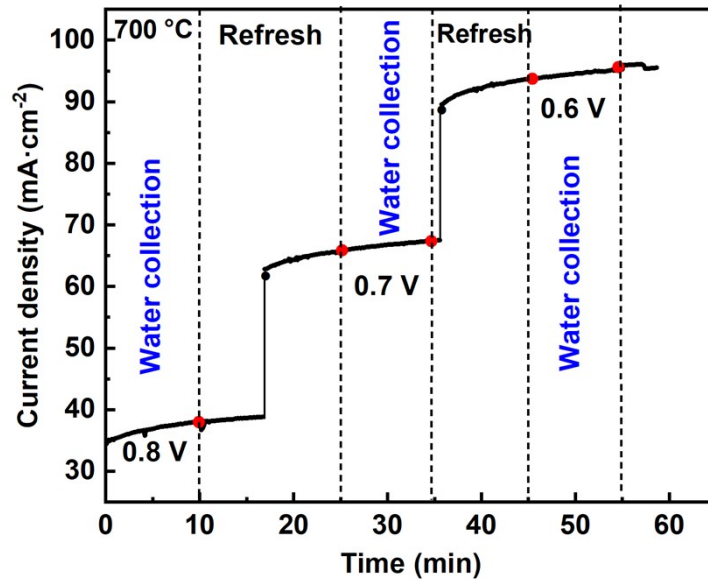

**Figure S3** Current density of BZY20-based cells tested in a potential static mode under 1:1- $\text{H}_2$ + $\text{D}_2$  fuel at 700°C;
